# Supplementary material for: YFR016c/Aip5 is part of an actin nucleation complex in yeast
Source: PubMed Central journal article supplement (PMC6737964; doi:10.1242/bio.044024), 2019-07-30
Supplement: biolopen-8-044024-s1.pdf [file biolopen-8-044024-s1.pdf]

# Figure S1

A

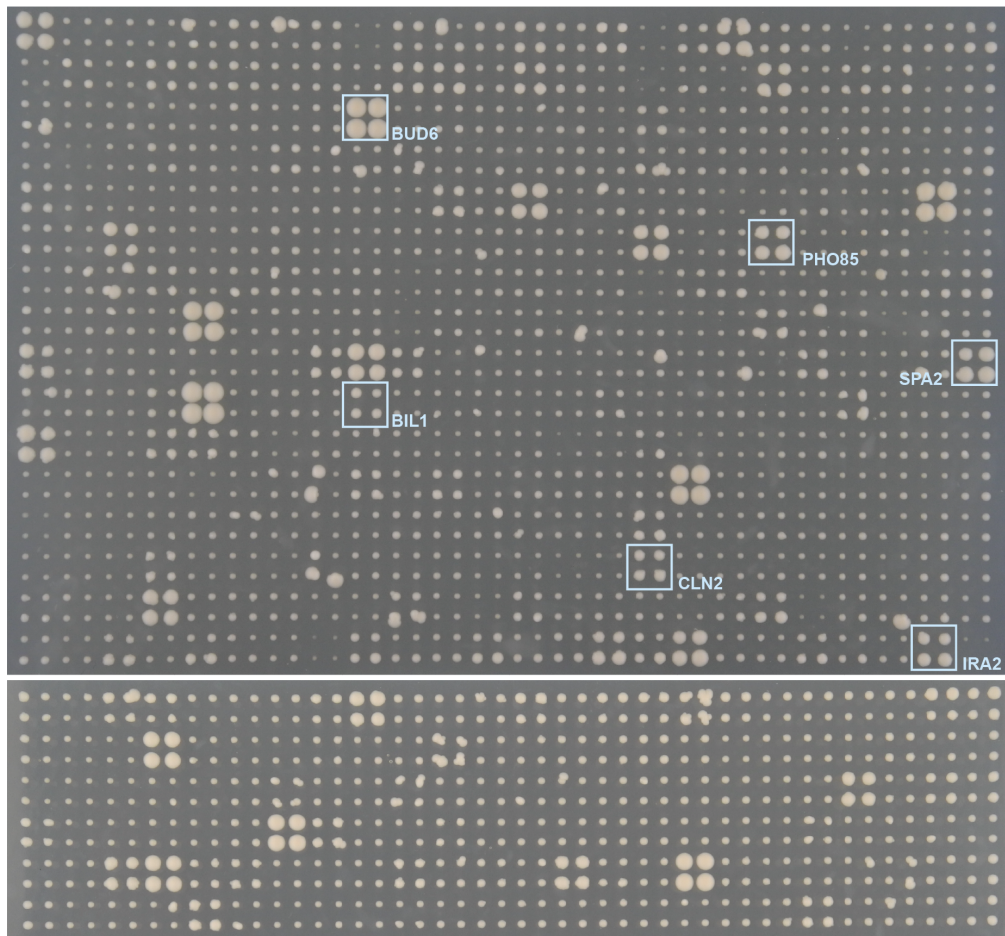

B

|                       |         |        |        |       |            |          |           |         |       |       |       |          |       |                       |        |         |        |         |        |       |       |        |        |       |
|-----------------------|---------|--------|--------|-------|------------|----------|-----------|---------|-------|-------|-------|----------|-------|-----------------------|--------|---------|--------|---------|--------|-------|-------|--------|--------|-------|
| ABP1                  | KEL1    | ASK10  | LDB17  | BFA1  | MEC1       | BN14     | MSS4      | BUD5    | NIS1  | CDC28 | PEY1  | CLA4     | PSY4  | CRZ1                  | RHO5   | EDI1    | SAC6   | FKS1    | SEC2   | HCM1  | SBS1  | INP52  | SMI1   |       |
| SSD1                  | BN15    | STT4   | SRO7   | TEF1  | CHS3       | UBP7     | BN11 STOP | YBR236C | VMA13 | NAS2  | CIK1  | CAP1     | SEC2  | CDC25                 | PLC1   | PEX4(P) | CLB1   | YPD1    | SPC24  | CYR1  | BUB3  | KSS1   | LCB4   |       |
| AFR1                  | KEL2    | BBC1   | LRE1   | BKI1  | MKK1       | BNR1     | MYO1      | BUD6    | NUM1  | CDC3  | PKI1  | CLB2     | PTC1  | CYK3                  | RIM21  | ELM1    | SAC7   | FKS2    | SEC3   | HLR1  | ST14  | IPL1   | SMP1   |       |
| SSK1                  | SVL3    | SWE1   | SHE4   | TOR2  | PPH3       | VAC8     | IQC1 STOP | YGR85W  | APP   | ZDS1  | SPC72 | BUD8     | SEC10 | SMT3(P)               | PDS1   | GUK1(P) | CLB3   | FUS2    | SPC110 | SEC15 | CSE4  | NHA1   | LCB5   |       |
| AIP1                  | KIC1    | BCK1   | LRG1   | BIM1  | MLC2       | BOH1     | MYO2      | BUD9    | ORC6  | CDC37 | PIL1  | CMD1     | RAD9  | DBF2                  | RLM1   | ENB3    | SAK1   | FUS3    | SFH1   | HOF1  | SKG6  | IPP1   | SMY1   |       |
| SSK2                  | AVO2(P) | SW14   | TOR1   | TOS2  | SHO1(P)    | VHS2     | AXL2 STOP | YKL1610 | ASE1  | ZDS2  | ARP6  | BCY1     | KAR3  | SEC42(P)              | PNC1   | TLG2(P) | APC2   | PHO88   | DUG1   | TPK1  | SPC19 | PTC2   | AUR1   |       |
| AMN1                  | KIN1    | BCK2   | LSP1   | BIR1  | MOB1       | BUB3     | MYO5      | CBK1    | PAC1  | CDC5  | PKC1  | CMK1     | RAX1  | DBF30                 | ROM2   | ENT2    | SCP1   | GIC1    | SFH2   | HOG1  | SKN7  | IQG1   | SOG2   |       |
| STE11                 | TCO89   | SW16   | APP1   | TPM1  | BOH1(P)    | VRP1     | SHO1 STOP | YMR124W | CIN1  | BOI2  | SMC1  | APG17    | DYN1  | CDC24                 | ELG1   | UBC6(P) | MPS1   | NBP2    | DAD1   | GPB2  | SPR28 | IRA1   | TSC13  |       |
| ARC1                  | KIN2    | BEM1   | LTE1   | BTF4  | MSB1       | BUD14    | NAP1      | CDC10   | PAM1  | CDC6  | PKH1  | CMP2     | RG2   | DOP1                  | RSR1   | FAB1    | SCP140 | GIN4    | SFH3   | HSL1  | SKT5  | IRS4   | SPA2   |       |
| STE20                 | AVO1    | SYF1   | NAS2   | TPM2  | BOH1SH3(P) | YBR953C  | HOF1 ΔFCB | YOR394C | KIP3  | SLA1  | MCD1  | ACE2     | BUD20 | A <sup>trb</sup> w(D) | CLB4   | SIZ1    | STU2   | MSN4    | SLH15  | SEC4  | CDC20 | RAS2   | ELO1   |       |
| ARC40                 | KIN4    | BEM2   | MAD2   | BMH1  | MSB3       | BUD2     | NBA1      | CDC11   | PAN1  | CHS1  | PKH2  | CNA1     | RHO1  | DSE1                  | RV8161 | FAR1    | SDP1   | GLG1    | SFH4   | HSL7  | SLA2  | IST2   | SFH1   |       |
| SVL3                  | ROM1    | TAO3   | LST8   | TSC11 | INN1       | YDL173V  | WSC1 STOP | YPK1    | PAC10 | STE50 | IRK1  | MLC1(P)  | GA2   | SSO1                  | CLN1   | CPR6    | DAM1   | MSN2    | HSK3   | PDE1  | CHK1  | RAS1   | LAG1   |       |
| A <sup>trb</sup> w(D) | KIP2    | BEM3   | MAD3   | BMH2  | MSB4       | BUD3     | NET1      | CDC12   | PBS2  | CHS2  | PKH3  | CNB1     | RHO2  | DUN1                  | RV8167 | FKH1    | SEC1   | GSY1    | SFH5   | HYM1  | SLM1  | KAR9   | SPT5   |       |
| STE5                  | HUA1    | TCB1   | KOG1   | TUS1  | BNR1 STOP  | YDL203C  | MID2 STOP | ZE01    | GIM4  | SRO77 | ESP1  | TEM1(P)  | IME2  | SNC1(P)               | CLN2   | PUF3    | STU1   | HOT1    | DAD2   | TOK1  | TEL1  | GPB1   | LAC1   |       |
| ARP1                  | LAS17   | BEM4   | MCK1   | BN1   | NBA1       | BUD4     | NP1       | CDC14   | PEA2  | CIN8  | PRK1  | CRN1     | RHO4  | ECM25                 | SAC1   | FKH2    | SEC14  | GUS1    | SFK1   | INP51 | SLT2  | KCC4   | SRV2   |       |
| STE7                  | YEL02C  | TDH1   | LEE(P) | URC9  | CYK3 ΔSH3  | YDR586C  | PEK1      | AIR1    | VHS1  | EXO84 | SCC4  | CDC42(P) | RG52  | PEX19(P)              | CLN3   | HSR2    | SPC34  | MSN1    | DAD3   | SKO1  | SKM1  | IRA2   |        |       |
| PAC11                 | SMC3    | CRM1   | NUF2   | DPL1  | PHO80      | ATY1     | ELP4      | TUM1    | UBA4  | NC52  | NC56  | URM1     | BSP1  | IKK1                  | ELP2   | ELP3    | ELP6   | YLR031W | MIS01  | NUP57 | NUP85 | SEH1   | NSP1   |       |
| NIC96                 | NUP49   | NUP145 | GSP1   | SCS2  | VAC17      | MMR1     | RGD1      | SIR2    | EXO70 | SEC5  | SEC6  | SEC7     | SEC8  | SEC9                  | SEC13  | SEC17   | GLC7   | YPT11   | YPT31  | YPT32 | SHE2  | SHE3   | INP2   |       |
| VPB1                  | MID2    | WSC1   | COY1   | CSE1  | NEW1       | SFB3     | NOP4      | MRC1    | RLP7  | PPZ2  | YAK1  | GIC2     | AIM44 | TCB2                  | TCB3   | SIC1    | OSH1   | OSH2    | OSH3   | OSH4  | OSH5  | OSH6   | OSH7   |       |
| CHC1                  | LEM3    | BNF1   | BNF2   | RG41  | GPB1       | EGD1     | CLC1      | MYO3    | MYO4  | MYO2  | MYO3  | MYO4     | MYO5  | MDM10                 | ULS1   | BOI1    | BOI2   | BEM1    | BEM3   | NBA1  | STE20 | CLA4   | NIS1   |       |
| Pho85                 |         |        |        |       |            |          |           |         |       |       | YPR   |          |       |                       |        |         |        |         |        |       |       |        |        |       |
| HOF1                  | NAT1    | SSB1   | SSB2   | SSZ1  | ZUO1       | RPL26A   | BTT1      | PXL1    | GLC8  | SDS22 | BOI2  | BOI2     | NBA1  | NBA1                  | NBA1   | SEC3    | RG2    | RG2     | STE4   | MON2  | RGD2  | RGL1   | GDI1   | SEC27 |
| RER1                  | DSL1    | DSL3   | SCS22  | BET3  | BET5       | YPT1 CEN | Δ140      | WK      | PL    | WK    | PL    | 255      | 100   | AXXP                  | AXXP   | AXXP    | TRK20  | TRK23   | TRK31  | TRK56 | TRK85 | TRK120 | TRK130 |       |

***In vivo* interaction screen of Aip5.** Upper panel: Split-Ubiquitin analysis of 533 diploid Aip5 CRU-containing yeast strains each co-expressing a different N<sub>ub</sub> fusion protein under a copper-inducible promoter. The N<sub>ub</sub> fusion proteins are enriched for proteins functioning in cell polarity, exocytosis, stress response and the actin cytoskeleton. The cells were mated, spotted in quadruplets and finally transferred onto medium containing 5-FOA and 150  $\mu$ M copper to induce the expression of the N<sub>ub</sub> fusions. Cells were incubated for 4 days. Positive hits are indicated in light blue and are: Bud6, Spa2, Cln2, Bil1, Pho85, Ira2. False positives and chaperones are removed from the list of interactors (Hruby et al, 2011). Lower panel: Positions and identities of N<sub>ub</sub>-fusions on the array.

**Figure S2**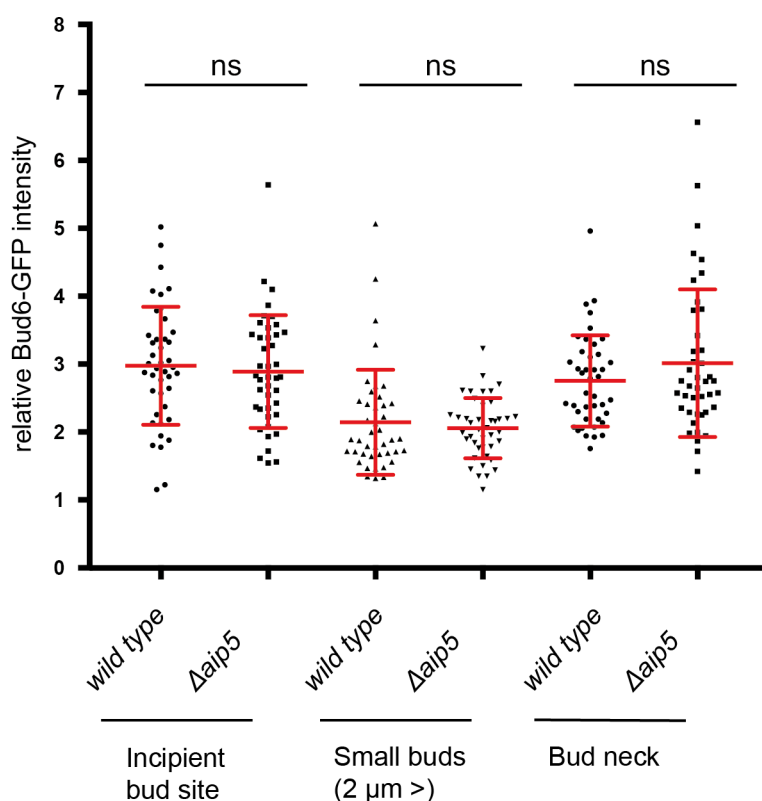

**Aip5 does not influence the localization of Bud6.** Time-resolved images of Bud6-GFP in wildtype (n=42)- or  $\Delta aip5$ -cells (n=42) were acquired to calculate the relative intensity at the presumptive bud site, at the tips of small buds ( $<2\mu\text{m}$ ) and at the bud neck. Images of 5 z-stacks were taken every 3 minutes over several cell cycles with a wide-field microscope and stacked to a sum projection for the analysis. Relative fluorescence intensity was normalized to the cytosol of the mother cell. Statistical analysis derived from two independent measurements was performed with a Kruskal-Wallis test followed by a Dunns post test. Mean values and standard deviation are shown in red.

**Figure S3**

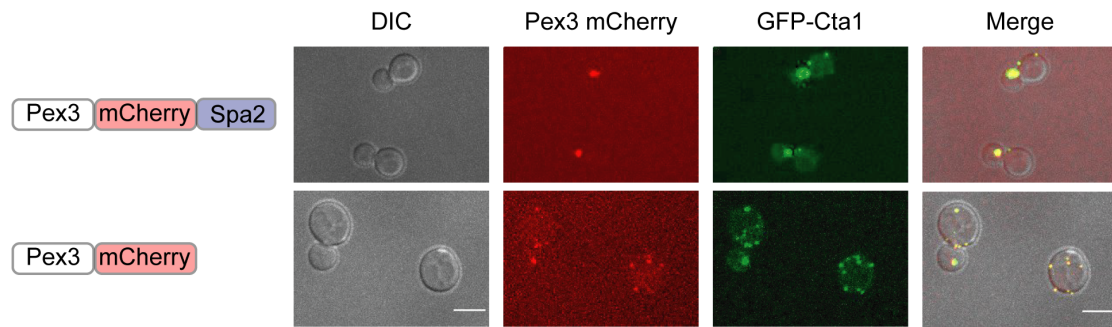

**Pex3-mCherry-Spa2 localizes to peroxisomes.** Colocalization of Pex<sub>1-45</sub>mCherry-Spa2 with the peroxisomal marker GFP Cta1. Confocal fluorescence microscopy images were taken in 10 z stacks and stacked to maximum projections. Scale bar indicates 5  $\mu$ m. Note that Spa2-decorated peroxisomes form large cluster at random sites in the cytosol. Scale bar indicates 5 $\mu$ M.

**Table S1.** Yeast and *E.coli* strains.

| Strain                                                      | Genotype                                                                                                                                              | Source                | Identifier |
|-------------------------------------------------------------|-------------------------------------------------------------------------------------------------------------------------------------------------------|-----------------------|------------|
| <i>E.coli</i> XL1 blue                                      | endA1 gyrA96(NalR) thi-1 recA1 relA1 lac glnV44 F' [::Tn10 proAB+ lacIq (lacZ)M15] hsdR17(rK- mK+)                                                    | Stratagene            | XL1 blue   |
| <i>E.coli</i> BI21 DE3                                      | F- ompT gal dcm lon hsdSB( rB-mB-) $\lambda$ (DE3) pLysS(CmR)                                                                                         | Invitrogen            | BL21 DE3   |
| Yeast JD47                                                  | <i>MAT<math>\alpha</math></i> , <i>his3-<math>\Delta</math>200</i> , <i>leu2-3, 112 lys2-801</i> , <i>trp1-<math>\Delta</math>63</i> , <i>ura3-52</i> | (Dohmen et al., 1995) | JD47       |
| Yeast JD53                                                  | <i>MAT<math>\alpha</math></i> , <i>his3-<math>\Delta</math>200</i> , <i>leu2-3, 112 lys2-801</i> , <i>trp1-<math>\Delta</math>63</i> , <i>ura3-52</i> | (Dohmen et al., 1995) | JD53       |
| JD47 AIP5 CRU                                               | AIP5::AIP5-CRU, HIS3                                                                                                                                  | This study            | STY218     |
| JD53 N <sub>ub</sub> -Bud6, $\Delta$ <i>spa2</i>            | BUD6::pCUP1-N <sub>ub</sub> -HA-BUD6, kanMX4, SPA2::CmLEU2                                                                                            | This study            | YAD617     |
| JD53 N <sub>ub</sub> -Kel1, $\Delta$ <i>spa2</i>            | KEL1::pCUP1-N <sub>ub</sub> -HA-KEL1, kanMX4, SPA2::CmLEU2                                                                                            | (Neller et al., 2015) | YAD616     |
| JD53 N <sub>ub</sub> -empty, $\Delta$ <i>spa2</i>           | pCUP1-N <sub>ub</sub> -HA kanMX4, CEN, SPA2::CmLeu2                                                                                                   | (Neller et al., 2015) | YAD618     |
| JD53 N <sub>ub</sub> -Spa2, $\Delta$ <i>bud6</i>            | SPA2::pCUP1-N <sub>ub</sub> -HA-SPA2, kanMX4, BUD6::CmLEU2                                                                                            | This study            | YAD614     |
| JD53 N <sub>ub</sub> -Kel1, $\Delta$ <i>bud6</i>            | KEL1::pCUP1-N <sub>ub</sub> -HA-KEL1, kanMX4, BUD6::CmLEU2                                                                                            | This study            | YAD613     |
| JD53 N <sub>ub</sub> -empty, $\Delta$ <i>bud6</i>           | pCUP1-N <sub>ub</sub> -HA kanMX4, CEN, BUD6::CmLEU2                                                                                                   | This study            | YAD615     |
| JD47 AIP5 GFP, SPA2 mCherry                                 | AIP5::AIP5 GFP, TRP1, SPA2::SPA2 mCherry, URA3                                                                                                        | This study            | YOG95      |
| JD47 AIP5 GFP, $\Delta$ <i>spa2</i>                         | AIP5::AIP5 GFP, TRP1, SPA2::hphNT1                                                                                                                    | This study            | YOG63      |
| JD47 AIP5 GFP, $\Delta$ <i>bud6</i>                         | AIP5::AIP5 GFP, TRP1, BUD6::natNT2                                                                                                                    | This study            | YOG424     |
| JD47 Pex3 <sub>1-45</sub> mCherrySpa2, $\Delta$ <i>spa2</i> | SPA2::hphNT1, ura3::URA3, PMET17-Pex3 <sub>1-45</sub> -mCherry-Spa2                                                                                   | This study            | YOG324     |
| JD47 Pex3 <sub>1-45</sub> mCherry, $\Delta$ <i>spa2</i>     | SPA2::hphNT1, ura3::URA3, PMET17-Pex3 <sub>1-45</sub> -mCherry                                                                                        | This study            | YOG369     |
| JD47 $\Delta$ <i>bud6</i>                                   | BUD6::natNT2                                                                                                                                          | This study            | ARY191     |
| JD47 $\Delta$ <i>aip5</i> ( <i>hph</i> )                    | AIP5::hphNT1                                                                                                                                          | This study            | YOG59      |
| JD47 $\Delta$ <i>aip5</i> ( <i>nat</i> ), Bud6 GFP          | BUD6::BUD6GFP, TRP1, AIP5::natNT2                                                                                                                     | This study            | YOG153     |

|                                                          |                                                                                |            |         |
|----------------------------------------------------------|--------------------------------------------------------------------------------|------------|---------|
| JD47<br><i>Δaip5Δbud6</i>                                | AIP5::hphNT1, BUD6::natNT2                                                     | This study | YOG265  |
| JD47 <i>Δtpm1</i>                                        | TPM1::hphNT2                                                                   | This study | YAD1340 |
| JD47<br><i>Δaip5Δtpm1</i>                                | TPM1::hphNT2, AIP5::natNT2                                                     | This study | YOG475  |
| JD47 AIP5<br>GFP                                         | AIP5::AIP5GFP, TRP1                                                            | This study | YOG69   |
| JD47<br><i>AIP5<sub>Δ1000-1125</sub></i>                 | <i>AIP5<sub>Δ1000-1125</sub></i>                                               | This study | YAD3444 |
| JD47<br><i>AIP5<sub>Δ1000-1125</sub></i><br><i>Δtpm1</i> | <i>AIP5<sub>Δ1000-1125</sub></i> , TPM1::hphNT1                                | This study | YAD3447 |
| JD47<br><i>AIP5<sub>Δ1000-1125</sub></i><br>CRU          | <i>AIP5<sub>Δ1000-1125</sub></i> :: <i>AIP5<sub>Δ1000-1125</sub></i> CRU, HIS3 | This study | YOG533  |

**Table S2.** Plasmid list.

| Plasmid                                             | Description                                                       | Source                                       |
|-----------------------------------------------------|-------------------------------------------------------------------|----------------------------------------------|
| pMet17-Cub-R-Ura3-pRS313 empty                      | pRS 313, lacZ, AmpR, His3                                         | (Hruby et al., 2011, Sikorski, Hieter, 1989) |
| pAC                                                 | pT7-HIS6, kanMXR                                                  | (Iffland et al., 2000)                       |
| pGex6P1                                             | pTAC-GST, ampR                                                    | Amersham                                     |
| pFA hphNT1                                          | pAgTEF- <i>hphNT1</i> , <i>Amp<sup>R</sup></i>                    | (Janke et al., 2004)                         |
| pFA natNT2                                          | pAgTEF- <i>natNT2</i> , <i>Amp<sup>R</sup></i>                    | (Janke et al., 2004)                         |
| pFA CmLEU2                                          | pAgTEF- <i>CmLEU2</i> , <i>Amp<sup>R</sup></i>                    | (Bahler et al., 1998)                        |
| N <sub>ub</sub> empty cen                           | pCUP1- <i>Nub-HA kanMX4</i> , <i>CEN</i> , <i>Amp<sup>R</sup></i> | (Hruby et al., 2011)                         |
| pMet17-GFP(S65T)-pRS313 empty                       | pRS313, lacZ, AmpR, His3                                          | (Tian, Wu & Johnsson, 2014)                  |
| GST Bud6 <sub>1-141</sub>                           | GST-Bud6 <sub>1-141</sub> pGex-2T                                 | This study                                   |
| GST Bud6 <sub>1-364</sub>                           | GST-Bud6 <sub>1-364</sub> 6P1                                     | This study                                   |
| His <sub>6</sub> AIP5 <sub>1000-end</sub>           | His <sub>6</sub> -TEV site- AIP5 <sub>1000-end</sub> pAC          | This study                                   |
| Cub-R-Ura3-pRS 303 empty                            | pRS 303, lacZ, AmpR, His3                                         | (Wittke et al., 1999)                        |
| AIP5 Cub-R-Ura3-pRS303                              | AIP5 Cub-R-Ura3 pRS303                                            | This study                                   |
| pMet17-Aip5 <sub>1-1233</sub> -Cub-R-Ura3 pRS313    | pMet17-Aip5 <sub>1-1233</sub> -Cub-R-Ura3 pRS313                  | This study                                   |
| pMet17-Aip5 <sub>1-300</sub> -Cub-R-Ura3 pRS313     | pMet17-Aip5 <sub>1-300</sub> -Cub-R-Ura3 pRS313                   | This study                                   |
| pMet17-Aip5 <sub>1-600</sub> -Cub-R-Ura3 pRS313     | pMet17-Aip5 <sub>1-600</sub> -Cub-R-Ura3 pRS313                   | This study                                   |
| pMet17-Aip5 <sub>1-1000</sub> -Cub-R-Ura3 pRS313    | pMet17-Aip5 <sub>1-1000</sub> -Cub-R-Ura3 pRS313                  | This study                                   |
| pMet17-Aip5 <sub>300-1233</sub> -Cub-R-Ura3 pRS313  | pMet17-Aip5 <sub>300-1233</sub> -Cub-R-Ura3 pRS313                | This study                                   |
| pMet17-Aip5 <sub>600-1233</sub> -Cub-R-Ura3 pRS313  | pMet17-Aip5 <sub>600-1233</sub> -Cub-R-Ura3 pRS313                | This study                                   |
| pMet17-Aip5 <sub>1000-1233</sub> -Cub-R-Ura3 pRS313 | pMet17-Aip5 <sub>1000-1233</sub> -Cub-R-Ura3 pRS313               | This study                                   |
| pMet17-Aip5 <sub>1125-1233</sub> -Cub-R-Ura3 pRS313 | pMet17-Aip5 <sub>1125-1233</sub> -Cub-R-Ura3 pRS313               | This study                                   |
| pMet17-Aip5 <sub>1000-1131</sub> -Cub-R-Ura3 pRS313 | pMet17-Aip5 <sub>1000-1131</sub> -Cub-R-Ura3 pRS313               | This study                                   |
| pMet17-Aip5 <sub>1-1233</sub> GFP(S65T) pRS313      | pMet17-Aip5 <sub>1-1233</sub> GFP(S65T) pRS313                    | This study                                   |
| pMet17-Aip5 <sub>1-300</sub> GFP(S65T) pRS313       | pMet17-Aip5 <sub>1-300</sub> GFP(S65T) pRS313                     | This study                                   |
| pMet17-Aip5 <sub>1-600</sub> GFP(S65T) pRS313       | pMet17-Aip5 <sub>1-600</sub> GFP(S65T) pRS313                     | This study                                   |



|                                                   |                                                               |                                                    |
|---------------------------------------------------|---------------------------------------------------------------|----------------------------------------------------|
| pMet17-Aip5 <sub>1-1000</sub> GFP(S65T) pRS313    | pMet17-Aip5 <sub>1-1000</sub> GFP(S65T) pRS313                | This study                                         |
| pMet17-Aip5 <sub>300-1233</sub> GFP(S65T) pRS313  | pMet17-Aip5 <sub>300-1233</sub> GFP(S65T) pRS313              | This study                                         |
| pMet17-Aip5 <sub>600-1233</sub> GFP(S65T) pRS313  | pMet17-Aip5 <sub>600-1233</sub> GFP(S65T) pRS313              | This study                                         |
| pMet17-Aip5 <sub>1000-1233</sub> GFP(S65T) pRS313 | pMet17-Aip5 <sub>1000-1233</sub> GFP(S65T) pRS313             | This study                                         |
| pMet17-Pex3 <sub>1-45</sub> -mcherry-mcs, pRS306  | pMet17-Pex3 <sub>1-45</sub> -mCherry-mcs, pRS306, Ura3, AmpR  | This study, idea based on (Luo, Zhang & Guo, 2014) |
| pMet17-Pex3 <sub>1-45</sub> -mcherry-Spa2, pRS306 | pMet17-Pex3 <sub>1-45</sub> -mCherry-Spa2, pRS306, Ura3, AmpR | This study                                         |
| Aip5 GFP, pRS304                                  | Aip5 GFP, pRS304, Trp1, AmpR                                  | This study                                         |
| Bud6 GFP, pRS304                                  | Bud6 GFP, pRS304, Trp1, AmpR                                  | This study                                         |
| Spa2 mCherry, pRS306                              | Spa2 mCherry, pRS306, Ura3, AmpR                              | (Neller et al., 2015)                              |
| N <sub>ub</sub> Bud6 <sub>1-364</sub> cen         | Pcup N <sub>ub</sub> HA kanMX Bud6 <sub>1-364</sub> , Cen     | This study                                         |
| N <sub>ub</sub> Bud6 <sub>360-end</sub> cen       | Pcup N <sub>ub</sub> HA kanMX Bud6 <sub>360-788</sub> , Cen   | This study                                         |
| N <sub>ub</sub> Bud6 <sub>1-240</sub> cen         | Pcup N <sub>ub</sub> HA kanMX Bud6 <sub>1-240</sub> , Cen     | This study                                         |
| N <sub>ub</sub> Bud6 <sub>1-141</sub> cen         | Pcup N <sub>ub</sub> HA kanMX Bud6 <sub>1-141</sub> , Cen     | This study                                         |
| pML104                                            | backbone: pRSII426                                            | (Laughery et al., 2015)                            |
| pML107                                            | Cen, Amp <sup>R</sup> , LEU2                                  | (Laughery et al., 2015)                            |
| pML107 Bem1-561                                   | pML107                                                        | This study                                         |
| pML107 Boi1-304                                   | pML107                                                        | This study                                         |
| P <sub>CTA1</sub> - GFP Cta1, pRS314              | pRS314                                                        | This study                                         |

**Table S3.** Primer list.

| Primer              | Sequence 5'→3'                                                                 |
|---------------------|--------------------------------------------------------------------------------|
| YFR016c Cub Eag     | CCTCCCGGCCGCTCTACTCCAATCACTAG                                                  |
| YFR016c Cub SAL     | CCACCGTTCGACCCAATAGTATCGTAAATGAGTTCC                                           |
| YFR016c Cub Ctr 450 | CGA ATG AGT TTT TAG AGC AAC                                                    |
| Cub ctr             | TCTTCTAGCTGCTTACCG                                                             |
| G1 YFR016c          | GTTTCTGAACACGAAATTGTGCG                                                        |
| G2 YFR016c          | CTATAAATCACATGTGCTGTC                                                          |
| S1 YFR016c          | GCAATTATTGTACTGGTGTGCTTGACTCTGGAT<br>TAAATAAAGAGTGACATG cgtacgctgcaggctcgac    |
| S2 YFR016c          | CACATGTGCTGTCAAGAGATTATGTTAGTTACGTA<br>GCGCGCTTAAGCTTTCTTA atcgatgaattcgagctcg |
| YFR016c_EagI_atg_fw | ccttCGGCCGCCATGGTAGAATCTTTGACTGTAG                                             |
| YFR016c_Glu301at    | cctccCGGCCGCCATGGAGATCTTAAATGTTAATGA                                           |



|                                 |                                                                              |
|---------------------------------|------------------------------------------------------------------------------|
| g_Eagl_fw                       | GGG                                                                          |
| YFR016c_Glu600at<br>g_Eagl_fw   | cctccCGGCCGCCATGGAAGATCAAGAAGGGGAAC                                          |
| YFR016c_Lys1000<br>atg_Eagl_fw  | ccctCGGCCGCCATGAAGGAATTGGAAGTAGAAGAA<br>AC                                   |
| YFR016c_Lys1125<br>atg_Eagl_fw  | cctccCGGCCGCCATGAAGCCACAAGACGTAATAAC<br>G                                    |
| YFR016c_Asn300_<br>Sall_rv      | CCACCGTCGACCCATTCTCTTCTCGAGGTAAGG                                            |
| YFR016c_Glu600_<br>Sall_rv      | CCACCGTCGACCCTTCTTTGGCAACCTCGAGATC                                           |
| YFR016c_Lys1000<br>_Sall_rv     | CCACCGTCGACCCCTTGTCTTCTCCTTTATTATCC                                          |
| YFR016c_1132<br>Salrv           | CCACCggtcgacCCCGTTATTACGTCTTGTGGCTTG                                         |
| YFR016c_Lys1000<br>_Sfil_TEV_fw | CctccGGCCAGCACGGCCGAAAACCTGTACTTCCAG<br>GGTAAGGAATTGGAAGTAGAAGAAAC           |
| YFR016c_end_Sfi1<br>_rv         | cctccGGCCAAAAGGCCGCTTTCTTAAATAGTATCG<br>TAAATG                               |
| S1 Bud6                         | GCTGGCTGCCAAATTGGTGTAGTAATCCTCGTATT<br>ATTTAAAATTAGATGcgtacgctgcaggtcgac     |
| S2 Bud6                         | AAGCCAAAAGCACTAATCTCTTTCCGTTAGCTTTC<br>ATAAAATTAGTGTATTTAatcgatgaattcgagctcg |
| G1 Bud6                         | TCG CTA GCC GAG CTG AAC GAA T                                                |
| G2 Bud6                         | CTG ACA GCT TAT GAT GCT GAT AAG G                                            |
| S1 Spa2                         | ACGAGCCACCGAAACAGAATAAACAAAAGAAAAGA<br>AAGAGTAAACcgtacgctgcaggtcgac          |
| S2 Spa2                         | ATTGTCTTTGTCTTCTTTCTTTCTCCTCTAGATAC<br>TACTAACTatcgatgaattcgagctcg           |
| G1 Spa2                         | CTGCGCCGGGTGATGCGTGACG                                                       |
| G2 Spa2                         | CCA AGG ATA GTG GGT GTT CTC                                                  |
| H3                              | GGAAGGAGTTAGACAACCTG                                                         |
| N3                              | CTCAGGTATAGCATGAGGTCGC                                                       |
| AgTefp RV                       | catgtcgctggccgggtgac                                                         |
| GFP<br>(S65T)ATG+84RV           | CGC CTT CAC CCT CTC CAC TGA C                                                |
| pMet fw                         | TTTCCTTCGTGTAATACAGGG                                                        |
| Bud6 ATG FW Sall                | cgatGTCGACCATGAAGATGGCCGTGGAT                                                |
| Bud6 141 RV<br>Acc65I           | cgat GGTACC TTACCGATGCTCTTGCTGCAT                                            |
| Bud6 240 RV<br>Acc65I           | cgatGGTACCTTATGAAAGTGCATCATCATCATC                                           |
| Bud6 364 Acc65I<br>Rv           | ggaggggtaccTTATACTGGACAAGTTCCATTC                                            |
| Bud6aip3 Nuisal1fw              | CCACCCGTGACCACTTGTCCAGTATTTTTTA                                              |
| Bud6 end RV<br>Acc65            | GACGGggtaccTTAAGTAAACCCCGGCCAAAAT                                            |
| Pex3_atg_Eagl_fw                | CctccCGGCCGATGGCCCCAAATCAAAGATC                                              |
| Pex3_Lys45_Xbal_<br>rv          | cctccTCTAGATTTATAACAACCATCTCTTCACG                                           |
| Spa2 GST fw1<br>BamHI           | CCACCGGATCCATGGGTACGTCAAGCGAG                                                |

|                         |                                                                                                    |
|-------------------------|----------------------------------------------------------------------------------------------------|
| Spa2_HA_Sall_rv         | CCTCCgtcgacCCagcgtaatctggaacatcgtatgggtaCTTCA<br>ACTTCGAATTCAAATAATTTATTTTC                        |
| gR1_YFR3309             | GATCAGTCTTTTCGCATCTAGTGATGTTTTAGAGCTA<br>G                                                         |
| gR2_YFR3309             | CTAGCTCTAAAACATCACTAGATGCGAAAGACT                                                                  |
| doYFRd1000-1125         | CCAGAATTGGAAAAACAAGATATAAAGGATAATAA<br>AGGAGAAGACAAGCCACAAGACGTAATAACGACTA<br>GCGAGATCCGGAAGCTGAAT |
| YFR016cCRISPtrl<br>2860 | CTAAGATTGCTGAGGCGCTC                                                                               |

## References

- Bahler, J., Wu, J.Q., Longtine, M.S., Shah, N.G., McKenzie, A., 3rd, Steever, A.B., Wach, A., Philippsen, P. & Pringle, J.R. 1998, "Heterologous modules for efficient and versatile PCR-based gene targeting in *Schizosaccharomyces pombe*", *Yeast (Chichester, England)*, vol. 14, no. 10, pp. 943-951.
- Dohmen, R.J., Stappen, R., McGrath, J.P., Forrova, H., Kolarov, J., Goffeau, A. & Varshavsky, A. 1995, "An essential yeast gene encoding a homolog of ubiquitin-activating enzyme", *The Journal of biological chemistry*, vol. 270, no. 30, pp. 18099-18109.
- Hruby, A., Zapatka, M., Heucke, S., Rieger, L., Wu, Y., Nussbaumer, U., Timmermann, S., Dunkler, A. & Johnsson, N. 2011, "A constraint network of interactions: protein-protein interaction analysis of the yeast type II phosphatase Ptc1p and its adaptor protein Nbp2p", *Journal of cell science*, vol. 124, no. Pt 1, pp. 35-46.
- Iffland, A., Tafelmeyer, P., Saudan, C. & Johnsson, K. 2000, "Directed molecular evolution of cytochrome c peroxidase", *Biochemistry*, vol. 39, no. 35, pp. 10790-10798.
- Janke, C., Magiera, M.M., Rathfelder, N., Taxis, C., Reber, S., Maekawa, H., Moreno-Borchart, A., Doenges, G., Schwob, E., Schiebel, E. & Knop, M. 2004, "A versatile toolbox for PCR-based tagging of yeast genes: new fluorescent proteins, more markers and promoter substitution cassettes", *Yeast (Chichester, England)*, vol. 21, no. 11, pp. 947-962.
- Laughery, M.F., Hunter, T., Brown, A., Hoopes, J., Ostbye, T., Shumaker, T. & Wyrick, J.J. 2015, "New vectors for simple and streamlined CRISPR-Cas9 genome editing in *Saccharomyces cerevisiae*", *Yeast (Chichester, England)*, vol. 32, no. 12, pp. 711-720.
- Luo, G., Zhang, J. & Guo, W. 2014, "The role of Sec3p in secretory vesicle targeting and exocyst complex assembly", *Molecular biology of the cell*, vol. 25, no. 23, pp. 3813-3822.
- Neller, J., Dunkler, A., Rosler, R. & Johnsson, N. 2015, "A protein complex containing Epo1p anchors the cortical endoplasmic reticulum to the yeast bud tip", *The Journal of cell biology*, vol. 208, no. 1, pp. 71-87.
- Sikorski, R.S. & Hieter, P. 1989, "A system of shuttle vectors and yeast host strains designed for efficient manipulation of DNA in *Saccharomyces cerevisiae*", *Genetics*, vol. 122, no. 1, pp. 19-27.
- Tian, C., Wu, Y. & Johnsson, N. 2014, "Stepwise and cooperative assembly of a cytokinetic core complex in *Saccharomyces cerevisiae*", *Journal of cell science*, vol. 127, no. Pt 16, pp. 3614-3624.
- Wittke, S., Lewke, N., Muller, S. & Johnsson, N. 1999, "Probing the molecular environment of membrane proteins in vivo", *Molecular biology of the cell*, vol. 10, no. 8, pp. 2519-2530.
